# Supplementary material for: The Treatment of Restless Legs Syndrome and Periodic Limb Movement Disorder in Adults—An Update for 2012: Practice Parameters with an Evidence-Based Systematic Review and Meta-Analyses
Source: Atypon-hosted journal article supplement (doi:10.1176/appi.focus.12.1.99), 2014-01-01
Supplement: 99_ds001.pdf [file 99_ds001.pdf]

**Data for meta-analyses**

**IRLS Rating Scale Total Scores for Cabergoline, Treatment vs. Baseline**

| Study                               | Study Length | # Pts Completed | Dose, mg/d    | IRLS Baseline Avg $\pm$ SD | IRLS Cabergoline Avg $\pm$ SD | P       |
|-------------------------------------|--------------|-----------------|---------------|----------------------------|-------------------------------|---------|
| Oertel, 2006 <sup>63</sup>          | 5 wks        | 20 each tx      | 2             | 31.2 $\pm$ 5.4             | 7.5 $\pm$ 15.3*               | < 0.01  |
| Stiasny-Kolster, 2004 <sup>64</sup> | 52 wks       | 22 <sup>†</sup> | 2.2 $\pm$ 1.1 | 27.7 $\pm$ 5.7             | 12.0 $\pm$ 16.3*              | < 0.001 |
| Benes, 2004 <sup>66</sup>           | 6 mo         | 248             | 1.5           | 26.8 $\pm$ 5.9             | 9.7 $\pm$ 9.0                 | < 0.001 |
| Zucconi, 2003 <sup>65</sup>         | 2 mo         | 10              | 1.1           | 23.1 $\pm$ 5.9**           | 9.8 $\pm$ 6.9                 | 0.005   |

<sup>†</sup>Number of patients on 2 mg dose, out of 85 patients in complete dose-finding trial.

\*Back calculated from difference data.

\*\*After 1 week of placebo treatment (24.3  $\pm$  2.9 at baseline). tx, treatment.

**IRLS Rating Scale Total Scores for Cabergoline vs. Placebo**

| Study                               | Study Length / # Pts Completed | Dose, mg/d                  | IRLS Comparison Avg (SD) | IRLS Cabergoline Avg (SD) | P        |
|-------------------------------------|--------------------------------|-----------------------------|--------------------------|---------------------------|----------|
| <b>Cabergoline vs. placebo</b>      |                                |                             |                          |                           |          |
| Oertel, 2006 <sup>63</sup>          | 5 wks / 40 (20 each tx)        | 2                           | -7.9 $\pm$ 11.0          | -23.7 $\pm$ 11.2          | 0.0002   |
| Stiasny-Kolster, 2004 <sup>64</sup> | 5 wks / 44 (22 each tx)        | 2                           | -3.3 $\pm$ 8.0           | -15.7 $\pm$ 11.9          | < 0.001  |
| <b>Cabergoline vs. levodopa</b>     |                                |                             |                          |                           |          |
| Trenkwalder, 2007 <sup>67</sup>     | 30 wks / 204                   | 2-3 cabergoline 200+ L-dopa | -8.8 $\pm$ 10.7          | -15.6 $\pm$ 10.8          | < 0.0001 |
| tx, treatment.                      |                                |                             |                          |                           |          |

### IRLS Rating Scale Total Scores for Pramipexole

| Study                                      | Study Length / # Pts Completed                                        | Dose quoted, mg/day | IRLS Baseline Avg (SD)                         | Δ IRLS Placebo Avg (SD) | Δ IRLS Pramipexole Avg (SD)               | P          |
|--------------------------------------------|-----------------------------------------------------------------------|---------------------|------------------------------------------------|-------------------------|-------------------------------------------|------------|
| <b>Large studies with placebo control</b>  |                                                                       |                     |                                                |                         |                                           |            |
| Montagna 2011 <sup>36</sup>                | 12 weeks / 199 placebo, 203 pramipexole                               | 0.125 to 0.75       | Placebo: 25.8 ± 5.4<br>Pramipexole: 25.9 ± 5.2 | -8.4 ± 8.3              | -14.5 ± 7.4                               | < 0.0001   |
| Ferini-Strambi, 2008 <sup>30</sup>         | 12 weeks / ITT 179 placebo, 178 pramipexole (278 completed)           | 0.42*               | Placebo: 24.6 ± 5.7<br>Pramipexole: 24.2 ± 5.2 | -9.6 ± 9.4              | -13.4 ± 9.3                               | < 0.0001   |
| Oertel, 2007 <sup>32</sup>                 | 6 weeks / 115 placebo, 230 pramipexole (338 completed)                | 0.35**              | Placebo: 24.9 ± 5.4<br>Pramipexole: 24.7 ± 5.2 | -5.7 ± 9.6              | -12.3 ± 9.1                               | < 0.0001   |
| Winkelman, 2006 <sup>31</sup>              | 12 weeks / 86 placebo, 80 pramipexole (281 total completed all doses) | 0.5                 | Placebo: 23.5 ± 5.2<br>Pramipexole: 22.9 ± 5.1 | -9.3 ± 9.3              | -13.8 ± 8.9                               | < 0.01     |
| <b>Large study without placebo control</b> |                                                                       |                     |                                                |                         |                                           |            |
| Inoue 2011 <sup>37</sup>                   | 6 weeks / 154 divided into 3 dose groups                              | 0.25, 0.5 and 0.75  | 22.3 ± 4.7                                     | N/A                     | -12.3 <sup>‡</sup> [95% CI: -13.4, -10.9] | Not stated |
| <b>Small studies with placebo control</b>  |                                                                       |                     |                                                |                         |                                           |            |
| Inoue 2010 <sup>34</sup>                   | 6 weeks / 21 placebo, 20 pramipexole                                  | 0.125-0.75          | Placebo: 25.1 ± 5.8<br>Pramipexole:            | -6.4 ± 7.4              | -16.1 ± 7.1                               | < 0.001    |

|                                 |                                                                                  |                                        |                                                   |                     |                      |               |
|---------------------------------|----------------------------------------------------------------------------------|----------------------------------------|---------------------------------------------------|---------------------|----------------------|---------------|
|                                 |                                                                                  |                                        | 23.4 ± 6.4                                        |                     |                      |               |
| Jama<br>2009 <sup>35,39</sup>   | 3 weeks / 21 placebo, 22 pramipexole                                             | 0.5 mg<br>(0.125 to<br>0.75<br>tested) | Placebo: 22.9 ± 4.2<br>Pramipexole:<br>23.6 ± 3.7 | -6 ± 9 <sup>†</sup> | -17 ± 9 <sup>†</sup> | <<br>0.0001   |
| Partinen,<br>2006 <sup>33</sup> | 3 weeks / 22 each pramipexole 0.5 mg and placebo (107 total completed all doses) | 0.5                                    | Placebo: 22.9 ± 4.2<br>Pramipexole:<br>23.6 ± 3.7 | -6.1 ± 7.0          | -17.0 ± 7.0          | <<br>0.0001   |
| <b>Long-term trial data</b>     |                                                                                  |                                        |                                                   |                     |                      |               |
| Inoue<br>2010 <sup>38</sup>     | 52 weeks / 140                                                                   | 0.125 to<br>0.75                       | 22.3 ± 4.7                                        | N/A                 | -17.4 ± 5.3          | Not<br>stated |
| Partinen<br>2008 <sup>39</sup>  | 26 weeks / 107                                                                   | 0.125 to<br>0.75                       | 23.0 ± 4.3                                        | N/A                 | -17.0 ± 5.5          | Not<br>stated |

\* Calculated from 0.125 mg for 15.4% (28/182), 0.25 mg for 33.0% (60/182), 0.5 mg for 26.9% (49/182), and 0.75 mg for 24.7% (45/182).

\*\*Median dose.

<sup>†</sup>Calculated from SE data given.

<sup>‡</sup>Mean of all doses.

#### IRLS Rating Scale Total Scores for Ropinirole

| Study                          | Study Length / # Pts Completed   | Dose, mg/d | IRLS Baseline Avg (SD) | IRLS Placebo Avg (SD) | IRLS Ropinirole Avg (SD) | P       |
|--------------------------------|----------------------------------|------------|------------------------|-----------------------|--------------------------|---------|
| Adler,<br>2004 <sup>48</sup>   | 4 wks each / 22 each tx          | 4.6 ± 2.0  | 25.0 ± 7.0             | 24.7 ± 7.2            | 13.0 ± 12.0              | < 0.001 |
|                                |                                  |            |                        | -0.3 ± 6.9            | -12.0 ± 9.6              |         |
| Bliwise,<br>2005 <sup>52</sup> | 2 wks / 13 placebo, 9 ropinirole | 1.4        | 22.6 ± 4.6             | 16 ± 6*               | 14 ± 9*                  | ns      |
|                                |                                  |            |                        | -6.6 ± 5.1            | -8.6 ± 6.7               |         |

|                                              |                                            |                               |                                                                                |                    |                     |                 |
|----------------------------------------------|--------------------------------------------|-------------------------------|--------------------------------------------------------------------------------|--------------------|---------------------|-----------------|
| Bogan,<br>2006 <sup>49</sup>                 | 12 wks /186<br>ropinirole, 191<br>placebo  | 2.1 ± 1.2                     | Ropinirole: 22.0<br>± 5.0                                                      | 11.9 ± 9.2<br>LOCF | 8.4 ± 7.3<br>LOCF   | < 0.001         |
|                                              |                                            |                               | Placebo: 21.6 ±<br>4.8                                                         | -9.7 ± 7.3         | -13.6 ± 6.2         |                 |
| Trenkwalder,<br>2004 <sup>50</sup>           | 12 wks / 146<br>ropinirole, 138<br>placebo | 1.9 ± 1.1                     | Ropinirole: 24.4<br>± 5.75                                                     | -8.0 ± 8.7         | -11.0 ± 8.7         | 0.0036          |
|                                              |                                            |                               | Placebo: 25.2 ±<br>5.63                                                        |                    |                     |                 |
| Walters,<br>2004 <sup>51</sup>               | 12 wks / 102<br>ropinirole, 107<br>placebo | 1.5                           | Ropinirole: 23.6<br>± 5.9                                                      | -8.7 ± 7.8         | -11.2 ± 7.7         | 0.0197          |
|                                              |                                            |                               | Placebo: 24.8 ±<br>5.4                                                         |                    |                     |                 |
| <b>Other data not used in meta-analysis</b>  |                                            |                               |                                                                                |                    |                     |                 |
| Garcia-<br>Borreguero,<br>2007 <sup>56</sup> | 1 year / 233 OC<br>and 307 LOCF            | 1.9                           | 22.0 ± 8.66                                                                    | Not<br>applicable  | 10.9 ± 7.71<br>OC   | Not<br>stated   |
|                                              |                                            |                               |                                                                                |                    | 12.0 ± 8.60<br>LOCF |                 |
| Kushida,<br>2008 <sup>54</sup>               | 12 wks / 175<br>ropinirole, 184<br>placebo | 3.1 ± 2.0<br>Divided<br>doses | Not stated                                                                     | -11 ± 13*<br>OC    | -15 ± 20*<br>OC     | < 0.001         |
| Montplaisir,<br>2006 <sup>55</sup>           | 12 wks / 92                                | 2.05 ± 1                      | Baseline = 24<br>weeks treated                                                 | +8.2               | +4.1                | 0.0246          |
| Allen,<br>2004 <sup>53</sup>                 | 12 wks / 59                                | 0.25-4.0                      | Adjusted treatment difference in favor of<br>ropinirole at week 12 LOCF = -1.2 |                    |                     | ns, P =<br>0.56 |

\*Estimated from figure in paper, SD calculated from graph data. OC, observed case; LOCF, Last observation carried forward.

### IRLS Rating Scale Total Scores for Rotigotine

| Study                                | Study Length / # Pts Completed              | Dose,* mg/d | IRLS Baseline Avg (SD)                          | IRLS Placebo Avg (SD) | IRLS Rotigotine Avg (SD) | P          |
|--------------------------------------|---------------------------------------------|-------------|-------------------------------------------------|-----------------------|--------------------------|------------|
| Hening 2010 <sup>110</sup>           | 6 mo / 99 placebo, 103 rotigotine           | 3.0         | Placebo: 23.1 ± 5.1<br>Rotigotine: 23.6 ± 5.0   | 14.5 ± 8.0            | 9.3 ± 8.5                | < 0.0001   |
|                                      |                                             |             |                                                 | -9.0 ± 7.7            | -14.3 ± 9.4              |            |
| Oertel 2010 <sup>111</sup>           | 4 wks / 20 placebo, 46 rotigotine           | Mean 2.1    | Placebo: 25.4 ± 6.3<br>Rotigotine: 26.3 ± 6.4   | -9.9 ± 9.9            | -16.5 ± 9.3              | Not stated |
| Oertel, 2008 <sup>107</sup>          | 6 wks / 333 total-53 placebo, 64 rotigotine | 3.0         | Placebo: 28.0 ± 6.3<br>Rotigotine: 27.4 ± 6.1   | 18.7 ± 10.6           | 10.1 ± 8.6               | < 0.0001   |
|                                      |                                             |             |                                                 | -9.3 ± 8.6            | -17.3 ± 7.4              |            |
| Stiasny-Kolster, 2004 <sup>108</sup> | 1 wk / 62 total-14 placebo, 19 rotigotine   | 4.5         | Placebo: 25.0 ± 18.7<br>Rotigotine: 25.9 ± 23.5 | -8.0 ± 8.2            | -15.7 ± 8.3              | < 0.01     |
| Trenkwalder, 2008 <sup>109</sup>     | 6 mo / 114 placebo, 112 rotigotine          | 3.0         | Placebo: 28.1 ± 6.3<br>Rotigotine: 28.0 ± 5.9   | -8.6 ± 9.6            | -16.8 ± 9.5              | < 0.0001   |

\*Data for other doses are listed in the evidence table available online at <http://www.aasmnet.org/practiceguidelines.aspx>.

### IRLS Rating Scale Total Scores for Gabapentin Enacarbil (GEn)

| Study                         | Study Length / # Pts Completed        | Dose, mg/d | IRLS Baseline Avg (SD) | IRLS Placebo Avg (SD) | IRLS Gabapentin Enacarbil Avg (SD) | P          |
|-------------------------------|---------------------------------------|------------|------------------------|-----------------------|------------------------------------|------------|
| Kushida 2009 <sup>82</sup>    | 12 wks / 92 placebo, 100 Gen          | 1200       | Placebo: 22.6 ± 4.9    | -8.8 ± 8.6            | -13.2 ± 9.2                        | 0.0003     |
|                               |                                       |            | GEn: 23.1 ± 4.9        |                       |                                    |            |
| Kushida 2009 <sup>86</sup>    | 2 wks / 24 each treatment (crossover) | 1800       | Placebo: 20.4          | -1.9 ± 6.3            | -12.1 ± 6.5                        | < 0.0001   |
|                               |                                       |            | GEn: 20.4              |                       |                                    |            |
| Walters 2009 <sup>84*</sup>   | 2 wks / 33 placebo, 33 Gen            | 1200       | Placebo: 22.4 ± 4.6    | -8.9 ± 7.7            | -16.1 ± 7.93                       | < 0.0001   |
|                               |                                       |            | GEn: 22.4 ± 4.4        |                       |                                    |            |
| Ellenbogen 2011 <sup>88</sup> | 52 wks / 376 in safety population     | 600-1800   | 23.2 ± 5.03            | N/A                   | -16.8 ± 8.21 OC                    | Not stated |
|                               |                                       |            |                        |                       | -15.2 ± 8.85 LOCF                  |            |
| Lee 2011 <sup>85</sup>        | 12 wks / 77/97 placebo, 104/115 GEn   | 600        | Placebo: 23.8 ± 4.58   | -9.8 ± 7.69           | -13.8 ± 8.09                       | < 0.0001   |
|                               |                                       |            | GEn: 23.1 ± 4.93       |                       |                                    |            |
|                               | 12 wks / 77/97 placebo, 98/113 GEn    | 1200       | Placebo: 23.8 ± 4.58   | -9.8 ± 7.69           | -13.0 ± 9.12                       | 0.0015     |
|                               |                                       |            | GEn: 23.2 ± 5.32       |                       |                                    |            |

\*Data for other doses are reported in the paper.
